# Supplementary material
Source: publisher figshare collection journal article supplement (https://frontiersin.figshare.com/ndownloader/files/20132465)
Supplement: Supplementary file [file 20132465]

## APPENDIX

### The Knowledge Management SECI Processes Questionnaire

| In this organization... |    |                                                                                                                         |
|-------------------------|----|-------------------------------------------------------------------------------------------------------------------------|
| MENT1                   | 1  | When employees start a new activity, they are supported by supervisors for a specific period of time.                   |
| MENT2                   | 2  | When facing problems in their work, employees interact with their colleagues constructively.                            |
| MENT3                   | 3  | Once hired, employees are trained by more experienced colleagues.                                                       |
| MENT4                   | 4  | Newcomers are supported in their job for a specific period of time.                                                     |
| MENT5                   | 5  | More experienced colleagues provide less experienced colleagues with constructive feedback about their work.            |
| MENT8                   | 6  | There are moments dedicated to the sharing of opinions between colleagues.                                              |
| SHA2                    | 7  | Colleagues are open to share knowledge and skills.                                                                      |
| SHA3                    | 8  | Each one's know-how is made available to colleagues to deal with the problems that may arise.                           |
| SHA4                    | 9  | We share useful knowledge to improve job results.                                                                       |
| SHA5                    | 10 | Colleagues make their professional experiences available, if someone has difficulty in completing their work.           |
| SHA6                    | 11 | The knowledge base needed to carry out one's work is always accessible.                                                 |
| SHA7                    | 12 | Colleagues are willing to share their knowledge and skills.                                                             |
| REFL1                   | 13 | Individuals are willing and open to changing the way they work in order to improve performance.                         |
| REFL2                   | 14 | We can learn and acquire benefits from experience.                                                                      |
| REFL3                   | 15 | It is a good habit to change working methods in light of the results achieved.                                          |
| REFL4                   | 16 | We monitor the effectiveness of our performance in order to plan future actions.                                        |
| REFL8                   | 17 | Reflecting upon past experiences allows us to improve the methodologies in use.                                         |
| REFL9                   | 18 | At the end of each project, we examine the mistakes made in order to prevent their repetition in the future.            |
| MEM2                    | 18 | Good practices are collected in databases so that employees may consult them when needed.                               |
| MEM3                    | 20 | Managers believe that successes, failures and past events should always be considered as examples for future decisions. |
| MEM4                    | 21 | Handbooks are produced for internal use on how to carry out activities.                                                 |
| MEM5                    | 22 | We produce a lot of useful and informative documents regarding the results achieved.                                    |
| MEM7                    | 23 | Activities are monitored by collecting and processing relevant data.                                                    |
| MEM8                    | 24 | We can consult handbooks or archives to improve our work.                                                               |
| OCOM1                   | 25 | Employees are informed about the work of other units.                                                                   |
| OCOM2                   | 26 | We organize meetings in order to keep us updated.                                                                       |
| OCOM4                   | 27 | Information is shared between supervisors and employees.                                                                |
| OCOM5                   | 28 | We are kept informed about what happens within the organization.                                                        |
| OCOM6                   | 29 | Information is shared between the different organizational units.                                                       |
| OCOM8                   | 30 | Useful information is effectively disseminated at work.                                                                 |
| TEC1                    | 31 | The technologies we use promote and support the circulation of ideas.                                                   |
| TEC2                    | 32 | Technologies that improve information dissemination and communication between employees are used.                       |
| TEC3                    | 33 | The use of information technology is guaranteed to all members of the organization.                                     |
| TEC4                    | 34 | We have invested in technologies that facilitate access to information sources                                          |

|       |    |                                                                                                           |
|-------|----|-----------------------------------------------------------------------------------------------------------|
|       |    | and databases.                                                                                            |
| TEC5  | 35 | Technologies allow us to easily share knowledge and information between different units.                  |
| TEC7  | 36 | All employees have access to technologies that facilitate the updating of information.                    |
| TRAI1 | 37 | Employees' work skills are developed through training.                                                    |
| TRAI2 | 38 | Supervision is a typical tool used to enhance the professional knowledge of employees                     |
| TRAI3 | 39 | We are encouraged to take training and professional development courses.                                  |
| TRAI4 | 40 | Job promotions are supported by training interventions.                                                   |
| TRAI5 | 41 | Training activities are carried out on the basis of employees' needs.                                     |
| TRAI6 | 42 | New employees are provided with adequate training in order to develop the skills required for their role. |
| DEV3  | 43 | We have time/resources to reflect upon how to improve our work.                                           |
| DEV4  | 44 | Employees' extra-work skills are valued.                                                                  |
| DEV5  | 45 | We are encouraged to propose new ideas or projects.                                                       |
| DEV6  | 46 | Appropriate resources are available for developing new skills.                                            |
| DEV8  | 47 | We are supported in tackling the complex challenges of our professional field.                            |
| DEV9  | 48 | Talents are valued.                                                                                       |

*Note.* A 5-point Likert-type response format, from 1 (*never or almost never*) to 5 (*very often or always*), is used.
